# Supplementary material for: When Professional and Educational Feedback Turns into a Cycle of Violence: A Qualitative Study of Educational and Punitive Interactions During Medical Residency
Source: Research Square preprint supplement (doi:10.21203/rs.3.rs-8417993/v1), 2026-01-28
Supplement: Supplementary file 1 [file 4852385a4c31900b70c3b331.pdf]

# Interview guide

- Can you describe your experiences with feedback during your residency training, including both positive and negative forms of feedback?
- What experiences have you had from observing how feedback was provided to your fellow residents?
- Have you personally experienced disciplinary actions or corrective feedback during your training? If so, could you describe that experience and its impact on you?
- Based on your observations, how were disciplinary actions or corrective feedback typically delivered to other residents?
- In your opinion, what are the most common mistakes or situations that usually lead to disciplinary actions or negative feedback during residency training?
- What role does the chief resident play in the processes of providing feedback, including encouragement and disciplinary measures?
- What roles do clinical faculty members, the vice dean for education, and the head of department play in providing feedback or implementing disciplinary actions?
- How do you perceive the relationship between the nature of the issue involved and the severity or type of feedback provided (positive or corrective)?
